# Supplementary material
Source: HighWire-hosted journal article supplement (https://www.jneurosci.org/highwire/filestream/596972/field_highwire_adjunct_files/0/Supplemetnal_Figures.pdf)

## Supplemental Figure Legends

**Fig. S1. Immunostaining of cultured neurons and astrocytes.** **A**, DIV12 neurons were stained with neuron-specific Tuj1 antibody (Millipore, Billerica, MA). **B**, DIV12 neurons were stained with glia-specific GFAP antibody (Millipore, Billerica, MA). Most cells were neurons. **C**, Cultured astrocytes were stained with GFAP antibody, which labeled most cells.

**Fig. S2. Information of primers.** **A**, Primers used for RT-qPCR. Shown were sequences of forward and reverse primers, length of anticipated PCR products, and annealing temperatures. From “RT-I” to “BDNF” are primers for rat. From “RT-H-I” to “RT-H-VI” are primers for human. **B**, Primers used for luciferase reporters.

**Fig. S3. Negative and positive controls of dual FISH.** **A**, Negative control. Dual FISH experiment was done with probes against *E. coli* DapB, a protein not expressed in mammalian cells. No signal was detected. **B**, Positive control. Dual FISH experiment was done with probes against UBC (ubiquitin C), a protein expressed in mammalian cell. Strong signals were detected.

**Fig. S4. KA stimulation of NRG1 type expression in cultured neurons.** Cortical neurons (DIV9) were treated for 6 hr without or with 100  $\mu$ M KA. RT-qPCR was conducted as in Fig. 6. \*\* $p < 0.01$ .

**Fig. S5. Neuronal activity regulation of type I NRG1 expression.** **A**, Identification of minimal promoter of type I NRG1. Luciferase constructs containing different length of type I promoter (from 96 bp to 7 kb) were used in dual luciferase assay. Luciferase activity was measured 24 hr after transfection. Values were normalized to internal control, *Renilla* activity and corrected by the size of luciferase constructs. Data were presented as folds above the values of the 7-kb promoter construct. **B**, Diagram of luciferase constructs. NFAT-1 or Egr-1 was deleted in the 2.9-kb 5'UTR. **C**, Luciferase activities of indicated luciferase constructs in SH-SY5Y cells. Experiments were performed as in Fig. 6. Values were normalized to corresponding controls. ED, Egr-1 deletion; ND, NFAT-1 deletion. \* $p < 0.05$ ; \*\* $p < 0.01$ ; NS, no significant difference.

**Fig. S6. NRG1 isoform expression patterns of cultured neurons at different ages.** DIV-dependent expression of NRG1 isoforms in cultured neurons.

**Fig. S1.**

**A**

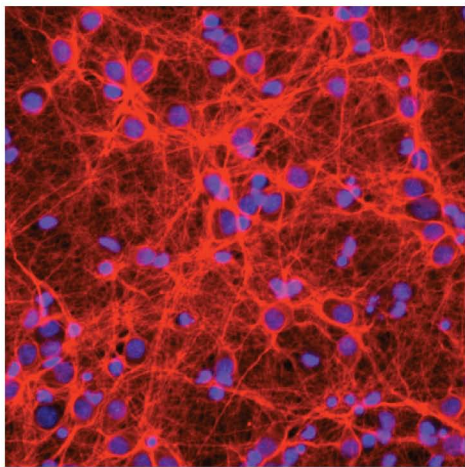

**B**

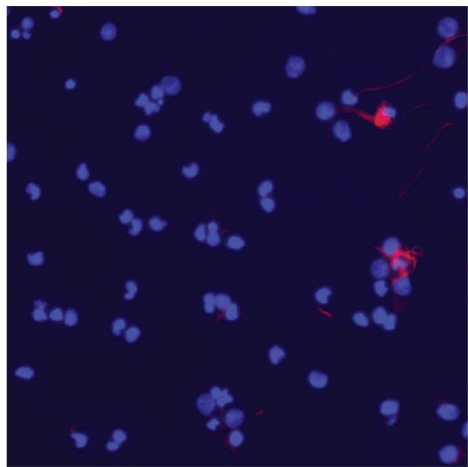

**C**

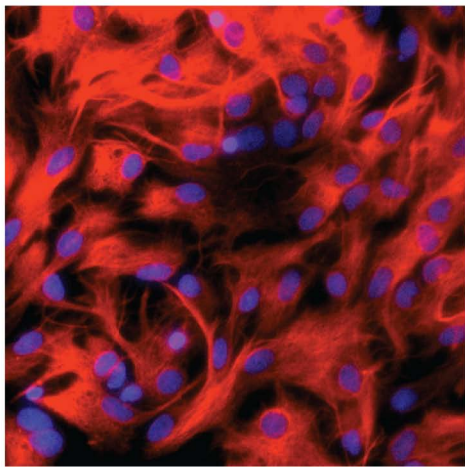

# Fig. S2.

## A

| Name     | Forward-primer              | Reverse-primer             | Length (bp) | Annealing temp (°C) |
|----------|-----------------------------|----------------------------|-------------|---------------------|
| RT-I     | TCATCTTCGGCGAGATGTCTG       | CTCCTGGCTCTTCATTTCTTTCA    | 152         | 60                  |
| RT-II    | GAGACTGGCCGCAACCTCA         | TGACTCCTGGCTCTTCATTTCTTT   | 97          | 60                  |
| RT-III   | GGACCCCTGAGGTGAGAACA        | CAGTCGTGGATGTCGATGTGG      | 102         | 60                  |
| RT-IV    | GGATCAGCACGGGGAAGG          | CACCGGAGCACTAGCTTGGGA      | 121         | 70                  |
| RT-V     | GCAAACCTCTACGGAGTTTTAA      | TCCTGGCTCTTCATTTCTTTCA     | 127         | 60                  |
| RT-VI    | ACAGGGIATGGAAGAGCAAGAAA     | GGTCCCAGTCGTGGATGTCCG      | 88          | 60                  |
| RT-EGF   | ACCAGCCATCTCATAAAAGTGCG     | TTGACGGGTTTGACAGGTCC       | 94          | 60                  |
| RT-b-1   | CAGATGTGGATCAGCAAGCAGG      | TTGTCAAAGAAAGGGTGAAAACG    | 112         | 60                  |
| RT-b-2   | GCGTCCACCCGCGAGTACAACC      | TGCACATGCCGGAGCCGTTGT      | 121         | 70                  |
| BDNF     | TGTGGTTTGTGGCCGTTGC         | TTTGTCTGTTTTCTGAAAGAGGGA   | 117         | 60                  |
| RT-H-I   | AGGGAAGGGCAAGAAGAAGGAGC     | TTCAATCGGGGAGGCAAGG        | 90          | 60                  |
| RT-H-II  | GGCTCAAGGAGGACAGCAGGTAC     | TTTCAATCGGGGAGGCAAGG       | 173         | 60                  |
| RT-H-III | CGCCATCCTTCCCTTCACCC        | GTTTTCTCCTTCTCCGCACATTTTAC | 166         | 60                  |
| RT-H-IV  | GCATGGGGAAAGGACGCG          | CAATTCATCCCATTTCTGAACCACT  | 170         | 60                  |
| RT-H-V   | AATCTTCTACGGAGTTTTAACCTACAC | GCCGATTCCTGGCTTTTCAT       | 131         | 60                  |
| RT-H-VI  | CTGGACTTCAAAGAGCAGGAAAGTATG | GATGGCTGTCCCAGTGGTGG       | 97          | 60                  |

## B

| Name      | Froward-primer                         | Reverse-primer                        |
|-----------|----------------------------------------|---------------------------------------|
| IVwt-Luc  | CACACGCTGCAGAGCCATCAATGAGGTC           | CACGCTAGCGCTGCTGCCGGAGCG              |
| IVdmt-Luc | GCATGGAGTAGAGGAGGCCTGAAGTGCACACTG      | CAGTGTGCACTTCAGATGCCTCTCTACTCCATGC    |
| IVpmt-Luc | CCTTGCTACTGAAGCCTTCACTCCCCAG           | CTGGGGAGTGAGAGGCTTCAGTGAGCAAGG        |
| 7k        | CACGAGCTCAGCCCTGTTATCATGATGACATTATGAAG | CACACGCTCTCAGTCCCCTGGCAATGCA          |
| 4.8k      | CACACGCTTGCAATTGCCAGGGGACTGAG          | CACGCTAGCCTCGCCGGAGACGGAGCGCT         |
| 2.9k      | CACACGCTTAATGTGAGATCTAAATTTT           | CACGCTAGCCTCGCCGGAGACGGAGCGCT         |
| 861       | CACACGCTTACCCTCCCTGCTGCTT              | CACGCTAGCCTCGCCGGAGACGGAGCGCT         |
| 441       | CACACGCTCCCCGAACCTTCTG                 | CACGCTAGCCTCGCCGGAGACGGAGCGCT         |
| 341       | GGTACCGAGCTTACGCGTAACTTTTCTGCGCCG      | CGGCGCAGAGAAAAGTTACCGCTAAGAGCTCGGTACC |
| 241       | GGTACCGAGCTTACGCGTCTCCGCTGGGTTT        | GAACCCAGGCGGAGAACCCTAAGAGCTCGGTACC    |
| 96        | GGTACCGAGCTTACGCGTCTCGGGTGGGGG         | CCCCACCCCGAGACGCGTAAGAGCTCGGTACC      |
| Egr-1-D   | GTCGCGCCTCGGTTGGTGGGGAAGAGGGAGGG       | CCCTCCTCTTCCCACCACCCGAGGCGCGGAC       |
| NFAT-1-D  | CCGGCCAGCGGGGGGCTGCGCCCG               | CGGGCGACCCCCCGCTGCCCCGG               |

**Fig. S3.**

**A**

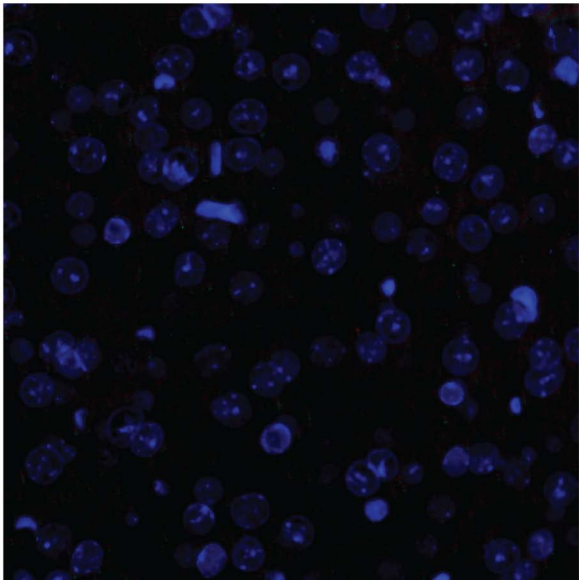

**B**

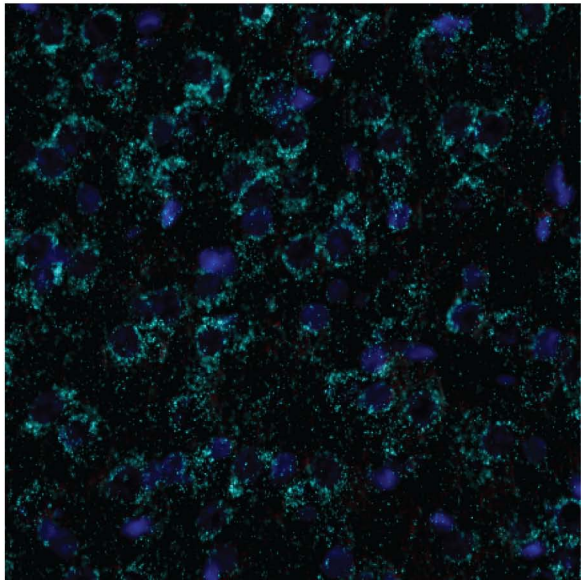

**Fig. S4.**

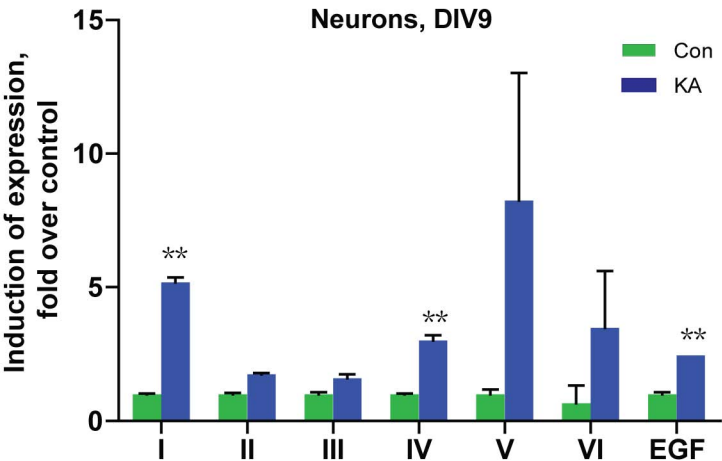

**Fig. S5.****A**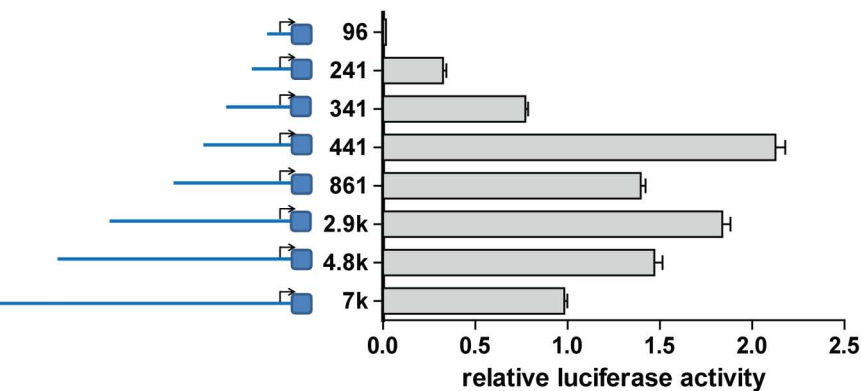**B**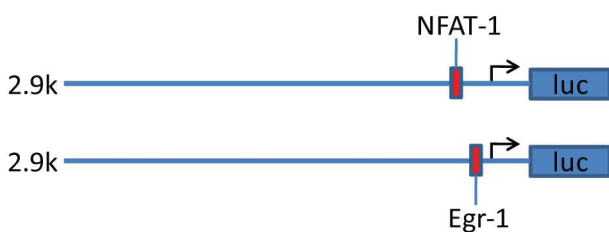**C**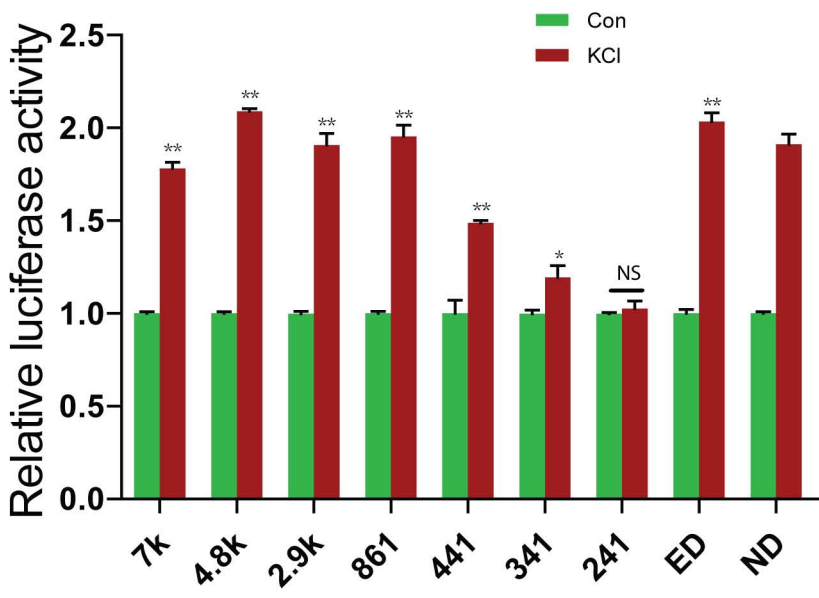

**Fig. S6.**

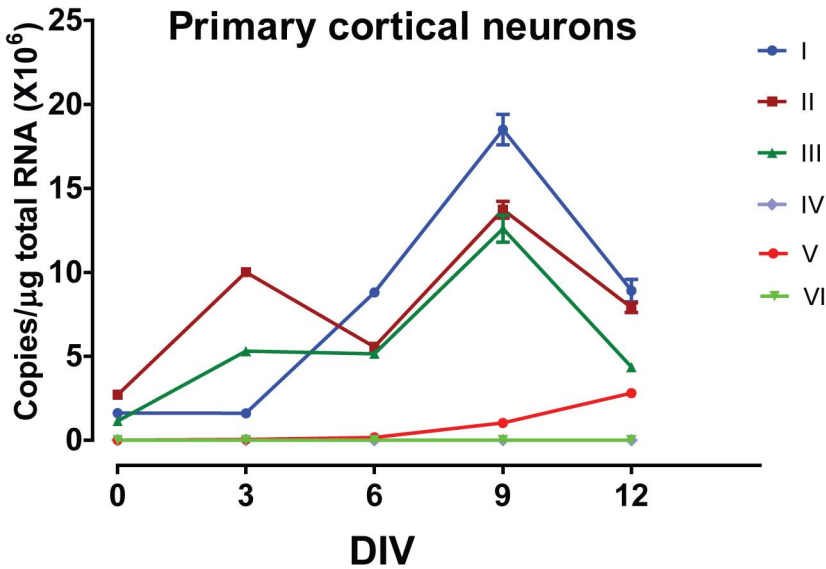

Supplement: Supplemetnal_Figures.pdf [file Supplemetnal_Figures.pdf]
